# Supplementary material for: Intersectional Disparities in Emergency Medicine Residents’ Performance Assessments by Race, Ethnicity, and Sex
Source: PubMed Central journal article supplement (PMC10514741; doi:10.1001/jamanetworkopen.2023.30847), 2023-09-21

## Supplemental Online Content

Lett E, Tran NK, Nweke N, et al. Intersectional disparities in emergency medicine residents' performance assessments by race, ethnicity, and sex. *JAMA Netw Open*. 2023;6(8):e2330847. doi:10.1001/jamanetworkopen.2023.30847

**eTable 1.** Resident Characteristics (AAMC) and Evaluations (ACGME) Data Merge

**eTable 2.** ACGME Emergency Resident Milestones

**eTable 3.** Residents Per Academic Year, Per Training Year

**eTable 4.** Residents Per Evaluation Period

**eTable 5.** Mean Competency Scores Over the Evaluation Period for US Emergency Residents in Three-Year Programs by Each Ethnoracial Group and Sex Cross-Strata

**eTable 6.** Mean Competency Scores Over the Evaluation Period for US Emergency Residents in Four-Year Programs by Each Ethnoracial Group and Sex Cross-Strata

**eTable 7.** Adjusted Differences in Mean Competency Scores Over the Evaluation Period for US Emergency Residents in Three-Year Programs by Each Ethnoracial Group and Sex Cross-Strata

**eTable 8.** Adjusted Differences in Mean Competency Scores Over the Evaluation Period for US Emergency Residents in Four-Year Programs by Each Ethnoracial Group and Sex Cross-Strata

**eTable 9.** Mean Evaluation Scores for Three-Year and Four-Year Programs Over the Study Period by Each Ethnoracial Group and Sex Cross-Strata

**eTable 10.** Adjusted Differences in Mean Evaluation Scores for Three-Year and Four-Year Programs Over the Study Period by Each Ethnoracial Group and Sex Cross-Strata

**eFigure 1.** Analytic Cohort Development and Exclusion Criteria

**eFigure 2.** Mean Competency Scores for the Overall Sample

**eFigure 3.** Mean Assessment Score for the Overall Sample

**eFigure 4.** Assessment Score Trajectories by Ethnoracial Group and Sex Cross-Strata

This supplemental material has been provided by the authors to give readers additional information about their work.

**eTable 1. Resident Characteristics (AAMC) and Evaluations (ACGME) Data Merge**

|                                              | <b>Resident Characteristics Data</b> | <b>Evaluations Data</b> | <b>Union (Present in either or both datasets)</b> | <b>Intersection (present in both datasets)</b> |
|----------------------------------------------|--------------------------------------|-------------------------|---------------------------------------------------|------------------------------------------------|
| Number of Residents (Number of Programs)     | 4368 (209 programs)                  | 4506 (216 programs)     | 4591 (216 total programs)                         | 4283 (209 Programs)                            |
| Numbers are not present in other data source | 85                                   | 223                     | 308                                               | 0                                              |

**eTable 2. ACGME Emergency Resident Milestones**

| <b>Competency</b>                       | <b>Subcompetency</b>                                                                |
|-----------------------------------------|-------------------------------------------------------------------------------------|
| Interpersonal and Communication Skills  | ICS1: Patient-Centered Communication                                                |
|                                         | ICS2: Team Management                                                               |
| Medical Knowledge                       | MK: Medical Knowledge                                                               |
| Patient Care                            | PC1: Emergency Stabilization                                                        |
|                                         | PC2: Performance of Focused History and Physical Exam                               |
|                                         | PC3: Diagnostic Studies                                                             |
|                                         | PC4: Diagnosis                                                                      |
|                                         | PC5: Pharmacotherapy                                                                |
|                                         | PC6: Observation and Reassessment                                                   |
|                                         | PC7: Disposition                                                                    |
|                                         | PC8: Multi-tasking (Task-switching)                                                 |
|                                         | PC9: General Approach to Procedures                                                 |
|                                         | PC10: Airway Management                                                             |
|                                         | PC11: Anesthesia and Acute Pain Management                                          |
|                                         | PC12: Other Diagnostic and Therapeutic Procedures: Goal-directed Focused Ultrasound |
|                                         | PC13: Other Diagnostic and Therapeutic Procedures: Wound Management                 |
|                                         | PC14: Other Diagnostic and Therapeutic Procedures: Vascular Access                  |
| Practice-Based Learning and Improvement | PBLI: Practice-Based Performance Improvement                                        |
| Professionalism                         | PROF1: Professional Values                                                          |
|                                         | PROF2: Accountability                                                               |
| Systems-Based Practice                  | SBP1: Patient Safety                                                                |
|                                         | SBP2: Systems-based Management                                                      |
|                                         | SBP3: Technology                                                                    |

**eTable 3. Residents Per Academic Year, Per Training Year**

| <b>Residents in Three-Year Programs</b> |       |       |       |       |
|-----------------------------------------|-------|-------|-------|-------|
| Academic Year                           | PGY-1 | PGY-2 | PGY-3 | PGY-4 |
| 2014-2015                               | 937   | –     | –     | –     |
| 2015-2016                               | 938   | 954   | –     | –     |
| 2016-2017                               | –     | 934   | 947   | –     |
| 2017-2018                               | –     | –     | 947   | –     |
| <b>Residents in Four-Year Programs</b>  |       |       |       |       |
| Academic Year                           | PGY-1 | PGY-2 | PGY-3 | PGY-4 |
| 2014-2015                               | 387   | 388   | –     | –     |
| 2015-2016                               | –     | 386   | 385   | –     |
| 2016-2017                               | –     | –     | 388   | 395   |
| 2017-2018                               | –     | –     | –     | 389   |

**eTable 4. Residents Per Evaluation Period**

| <b>Residency Year</b> | <b>Evaluation Point</b> | <b>Total</b> | <b>Three-Year</b> | <b>Four-Year</b> |
|-----------------------|-------------------------|--------------|-------------------|------------------|
| First                 | Mid-Year                | 2260         | 1873              | 387              |
|                       | Year-End                | 2245         | 1858              | 387              |
| Second                | Mid-Year                | 2644         | 1873              | 771              |
|                       | Year-End                | 2642         | 1869              | 773              |
| Third                 | Mid-Year                | 2652         | 1880              | 772              |
|                       | Year-End                | 2639         | 1867              | 772              |
| Fourth                | Mid-Year                | 784          | –                 | 784              |
|                       | Year-End                | 768          | –                 | 768              |

**eTable 5. Mean Competency Scores Over the Evaluation Period for US Emergency Residents in *Three-Year* Programs by Each Ethnoracial Group and Sex Cross-Strata**

| Assessment Period | Racial Groups | Sex    | Interpersonal and Communication Skills | Medical Knowledge | Patient Care | Practice-Based Learning and Improvement | Professionalism | System-Based Practice |
|-------------------|---------------|--------|----------------------------------------|-------------------|--------------|-----------------------------------------|-----------------|-----------------------|
|                   |               |        | Mean (SD)                              | Mean (SD)         | Mean (SD)    | Mean (SD)                               | Mean (SD)       | Mean (SD)             |
| Mid-PGY1          | White         | Male   | 2.55 (0.92)                            | 1.91 (0.88)       | 2.35 (0.72)  | 2.39 (1.03)                             | 2.61 (0.95)     | 2.39 (0.83)           |
| Mid-PGY1          | White         | Female | 2.66 (0.96)                            | 1.92 (0.87)       | 2.44 (0.72)  | 2.44 (1.00)                             | 2.77 (1.02)     | 2.48 (0.84)           |
| Mid-PGY1          | Asian         | Male   | 2.52 (0.96)                            | 1.95 (0.98)       | 2.28 (0.78)  | 2.43 (1.05)                             | 2.60 (1.11)     | 2.33 (0.88)           |
| Mid-PGY1          | Asian         | Female | 2.54 (0.94)                            | 1.94 (1.06)       | 2.40 (0.77)  | 2.45 (1.15)                             | 2.73 (1.01)     | 2.50 (0.86)           |
| Mid-PGY1          | URM           | Male   | 2.55 (1.10)                            | 1.74 (0.88)       | 2.18 (0.78)  | 2.30 (1.21)                             | 2.63 (1.23)     | 2.24 (0.98)           |
| Mid-PGY1          | URM           | Female | 2.60 (1.01)                            | 1.89 (0.88)       | 2.34 (0.75)  | 2.57 (1.16)                             | 2.76 (1.03)     | 2.48 (0.95)           |
| End-PGY1          | White         | Male   | 3.48 (0.95)                            | 3.15 (1.21)       | 3.38 (0.76)  | 3.32 (1.01)                             | 3.47 (0.95)     | 3.36 (0.85)           |
| End-PGY1          | White         | Female | 3.57 (0.94)                            | 3.15 (1.16)       | 3.44 (0.76)  | 3.47 (0.95)                             | 3.61 (1.00)     | 3.47 (0.86)           |
| End-PGY1          | Asian         | Male   | 3.39 (1.01)                            | 3.18 (1.29)       | 3.27 (0.77)  | 3.40 (1.07)                             | 3.43 (1.00)     | 3.32 (0.86)           |
| End-PGY1          | Asian         | Female | 3.30 (0.88)                            | 2.9 (1.19)        | 3.32 (0.75)  | 3.37 (0.97)                             | 3.46 (1.00)     | 3.37 (0.89)           |
| End-PGY1          | URM           | Male   | 3.42 (1.12)                            | 2.94 (1.24)       | 3.17 (0.83)  | 3.34 (1.09)                             | 3.48 (1.12)     | 3.32 (1.09)           |
| End-PGY1          | URM           | Female | 3.53 (1.03)                            | 2.75 (1.12)       | 3.25 (0.80)  | 3.55 (1.08)                             | 3.57 (1.12)     | 3.44 (0.90)           |
| Mid-PGY2          | White         | Male   | 4.58 (0.93)                            | 4.02 (1.22)       | 4.58 (0.74)  | 4.33 (0.96)                             | 4.50 (0.96)     | 4.47 (0.83)           |
| Mid-PGY2          | White         | Female | 4.64 (0.88)                            | 4.00 (1.19)       | 4.61 (0.72)  | 4.41 (0.85)                             | 4.59 (0.98)     | 4.50 (0.82)           |
| Mid-PGY2          | Asian         | Male   | 4.37 (1.02)                            | 4.01 (1.29)       | 4.43 (0.86)  | 4.24 (1.07)                             | 4.43 (1.05)     | 4.32 (0.92)           |
| Mid-PGY2          | Asian         | Female | 4.33 (1.02)                            | 3.74 (1.18)       | 4.37 (0.78)  | 4.28 (0.92)                             | 4.44 (0.94)     | 4.26 (0.86)           |
| Mid-PGY2          | URM           | Male   | 4.51 (1.05)                            | 3.71 (1.21)       | 4.36 (0.77)  | 4.20 (0.95)                             | 4.37 (0.98)     | 4.32 (0.92)           |
| Mid-PGY2          | URM           | Female | 4.43 (0.88)                            | 3.52 (1.16)       | 4.30 (0.77)  | 4.31 (0.93)                             | 4.35 (0.98)     | 4.32 (0.86)           |
| End-PGY2          | White         | Male   | 5.30 (0.86)                            | 5.12 (1.22)       | 5.33 (0.70)  | 5.03 (0.92)                             | 5.22 (0.92)     | 5.21 (0.75)           |
| End-PGY2          | White         | Female | 5.40 (0.81)                            | 5.01 (1.20)       | 5.33 (0.67)  | 5.01 (1.01)                             | 5.27 (0.97)     | 5.23 (0.72)           |
| End-PGY2          | Asian         | Male   | 5.11 (0.90)                            | 4.94 (1.26)       | 5.21 (0.76)  | 4.89 (1.05)                             | 5.07 (0.98)     | 5.06 (0.80)           |
| End-PGY2          | Asian         | Female | 5.07 (0.91)                            | 4.81 (1.24)       | 5.06 (0.81)  | 4.93 (1.06)                             | 4.97 (1.15)     | 5.06 (0.82)           |
| End-PGY2          | URM           | Male   | 5.18 (0.90)                            | 4.68 (1.29)       | 5.07 (0.74)  | 4.88 (1.00)                             | 5.11 (1.05)     | 5.01 (0.86)           |
| End-PGY2          | URM           | Female | 5.27 (0.82)                            | 4.64 (1.31)       | 5.06 (0.70)  | 4.83 (1.12)                             | 5.08 (0.95)     | 5.10 (0.82)           |
| Mid-PGY3          | White         | Male   | 6.23 (0.85)                            | 5.78 (1.18)       | 6.29 (0.70)  | 5.92 (1.10)                             | 6.02 (0.98)     | 6.13 (0.76)           |
| Mid-PGY3          | White         | Female | 6.34 (0.72)                            | 5.66 (1.24)       | 6.36 (0.62)  | 6.01 (0.92)                             | 6.14 (0.89)     | 6.18 (0.69)           |
| Mid-PGY3          | Asian         | Male   | 6.05 (0.93)                            | 5.60 (1.23)       | 6.19 (0.73)  | 5.87 (1.20)                             | 5.93 (1.03)     | 6.09 (0.75)           |
| Mid-PGY3          | Asian         | Female | 6.05 (0.97)                            | 5.35 (1.31)       | 6.18 (0.77)  | 5.79 (1.10)                             | 5.91 (1.01)     | 6.05 (0.84)           |
| Mid-PGY3          | URM           | Male   | 6.09 (0.87)                            | 5.36 (1.26)       | 6.05 (0.74)  | 5.64 (1.12)                             | 5.90 (1.06)     | 5.89 (0.76)           |
| Mid-PGY3          | URM           | Female | 6.19 (0.73)                            | 5.40 (1.28)       | 6.14 (0.66)  | 5.81 (0.85)                             | 6.04 (0.98)     | 6.08 (0.72)           |

|          |       |        |             |             |             |             |             |             |
|----------|-------|--------|-------------|-------------|-------------|-------------|-------------|-------------|
| End-PGY3 | White | Male   | 6.93 (0.67) | 6.66 (1.06) | 7.01 (0.56) | 6.79 (0.96) | 6.80 (0.89) | 6.87 (0.61) |
| End-PGY3 | White | Female | 7.00 (0.61) | 6.61 (1.03) | 7.04 (0.49) | 6.81 (0.79) | 6.90 (0.76) | 6.92 (0.56) |
| End-PGY3 | Asian | Male   | 6.80 (0.74) | 6.48 (1.06) | 6.89 (0.55) | 6.71 (0.98) | 6.69 (0.89) | 6.76 (0.63) |
| End-PGY3 | Asian | Female | 6.85 (0.69) | 6.31 (1.15) | 6.89 (0.58) | 6.65 (1.05) | 6.74 (0.75) | 6.84 (0.59) |
| End-PGY3 | URM   | Male   | 6.80 (0.89) | 5.94 (1.45) | 6.82 (0.64) | 6.47 (1.18) | 6.64 (1.09) | 6.71 (0.69) |
| End-PGY3 | URM   | Female | 6.88 (0.65) | 6.17 (1.35) | 6.86 (0.55) | 6.48 (1.39) | 6.62 (1.04) | 6.81 (0.64) |

**eTable 6. Mean Competency Scores Over the Evaluation Period for US Emergency Residents in *Four-Year Programs* by Each Ethnoracial Group and Sex Cross-Strata**

| Assessment Period | Racial Groups | Sex    | Interpersonal and Communication Skills | Medical Knowledge | Patient Care | Practice-Based Learning and Improvement | Professionalism | System-Based Practice |
|-------------------|---------------|--------|----------------------------------------|-------------------|--------------|-----------------------------------------|-----------------|-----------------------|
|                   |               |        | Mean (SD)                              | Mean (SD)         | Mean (SD)    | Mean (SD)                               | Mean (SD)       | Mean (SD)             |
| Mid-PGY1          | White         | Male   | 2.29 (1.04)                            | 1.43 (0.68)       | 2.03 (0.76)  | 1.90 (0.90)                             | 2.40 (1.07)     | 1.98 (0.78)           |
| Mid-PGY1          | White         | Female | 2.37 (1.09)                            | 1.36 (0.55)       | 2.04 (0.71)  | 2.02 (1.01)                             | 2.30 (0.95)     | 1.99 (0.77)           |
| Mid-PGY1          | Asian         | Male   | 2.29 (1.22)                            | 1.55 (0.75)       | 1.99 (0.80)  | 1.93 (0.99)                             | 2.35 (1.01)     | 2.01 (0.91)           |
| Mid-PGY1          | Asian         | Female | 2.34 (1.30)                            | 1.41 (0.61)       | 2.07 (0.75)  | 2.00 (1.02)                             | 2.24 (1.08)     | 2.11 (0.90)           |
| Mid-PGY1          | URM           | Male   | 2.22 (0.97)                            | 1.43 (0.78)       | 2.04 (0.72)  | 1.90 (0.90)                             | 2.21 (1.17)     | 2.03 (0.84)           |
| Mid-PGY1          | URM           | Female | 2.77 (1.48)                            | 1.54 (0.69)       | 2.20 (0.95)  | 2.25 (0.97)                             | 2.75 (1.00)     | 2.25 (0.99)           |
| End-PGY1          | White         | Male   | 3.21 (0.84)                            | 2.64 (0.92)       | 2.93 (0.54)  | 2.61 (0.82)                             | 3.15 (0.83)     | 2.91 (0.77)           |
| End-PGY1          | White         | Female | 3.17 (0.92)                            | 2.49 (0.78)       | 2.86 (0.64)  | 2.69 (0.92)                             | 3.09 (0.89)     | 2.83 (0.77)           |
| End-PGY1          | Asian         | Male   | 3.22 (0.84)                            | 2.64 (0.74)       | 2.87 (0.57)  | 2.66 (0.85)                             | 3.12 (0.69)     | 2.89 (0.73)           |
| End-PGY1          | Asian         | Female | 3.10 (1.13)                            | 2.24 (0.65)       | 2.79 (0.56)  | 2.62 (1.28)                             | 3.01 (0.78)     | 2.96 (0.76)           |
| End-PGY1          | URM           | Male   | 2.92 (0.90)                            | 2.25 (0.67)       | 2.74 (0.55)  | 2.28 (0.75)                             | 2.86 (0.85)     | 2.76 (0.65)           |
| End-PGY1          | URM           | Female | 3.30 (0.91)                            | 2.32 (0.82)       | 2.97 (0.52)  | 2.82 (0.86)                             | 3.29 (0.84)     | 3.02 (0.80)           |
| Mid-PGY2          | White         | Male   | 4.03 (0.96)                            | 3.32 (1.03)       | 3.92 (0.71)  | 3.72 (0.90)                             | 3.93 (0.93)     | 3.81 (0.77)           |
| Mid-PGY2          | White         | Female | 4.08 (0.90)                            | 3.21 (0.92)       | 3.84 (0.71)  | 3.60 (0.93)                             | 3.97 (0.88)     | 3.79 (0.79)           |
| Mid-PGY2          | Asian         | Male   | 4.02 (0.98)                            | 3.23 (0.91)       | 3.85 (0.71)  | 3.75 (0.97)                             | 3.97 (0.88)     | 3.83 (0.87)           |
| Mid-PGY2          | Asian         | Female | 3.98 (1.08)                            | 2.98 (1.08)       | 3.84 (0.79)  | 3.55 (0.98)                             | 3.83 (0.97)     | 3.76 (0.90)           |
| Mid-PGY2          | URM           | Male   | 3.82 (1.24)                            | 2.82 (0.84)       | 3.64 (0.79)  | 3.56 (1.01)                             | 3.69 (1.19)     | 3.66 (0.94)           |
| Mid-PGY2          | URM           | Female | 3.96 (0.92)                            | 2.96 (0.83)       | 3.78 (0.70)  | 3.47 (0.93)                             | 3.88 (1.00)     | 3.60 (0.79)           |
| End-PGY2          | White         | Male   | 4.78 (0.89)                            | 4.49 (1.10)       | 4.66 (0.70)  | 4.52 (0.90)                             | 4.67 (0.87)     | 4.54 (0.74)           |
| End-PGY2          | White         | Female | 4.68 (0.97)                            | 4.31 (1.16)       | 4.56 (0.75)  | 4.37 (1.00)                             | 4.59 (0.99)     | 4.49 (0.88)           |
| End-PGY2          | Asian         | Male   | 4.60 (0.90)                            | 4.26 (1.02)       | 4.56 (0.73)  | 4.55 (0.93)                             | 4.59 (0.81)     | 4.55 (0.90)           |
| End-PGY2          | Asian         | Female | 4.69 (1.15)                            | 4.36 (1.02)       | 4.51 (0.82)  | 4.59 (0.90)                             | 4.59 (1.09)     | 4.54 (0.90)           |
| End-PGY2          | URM           | Male   | 4.57 (1.19)                            | 4.12 (1.03)       | 4.42 (0.78)  | 4.30 (0.89)                             | 4.36 (1.26)     | 4.51 (0.99)           |
| End-PGY2          | URM           | Female | 4.68 (0.87)                            | 3.72 (1.03)       | 4.52 (0.78)  | 4.26 (0.90)                             | 4.42 (1.13)     | 4.39 (0.85)           |
| Mid-PGY3          | White         | Male   | 5.58 (0.84)                            | 5.04 (1.18)       | 5.57 (0.64)  | 5.22 (1.01)                             | 5.43 (0.88)     | 5.41 (0.69)           |
| Mid-PGY3          | White         | Female | 5.61 (0.83)                            | 4.89 (1.23)       | 5.50 (0.68)  | 5.18 (0.96)                             | 5.41 (0.99)     | 5.43 (0.75)           |
| Mid-PGY3          | Asian         | Male   | 5.46 (0.88)                            | 4.92 (1.21)       | 5.52 (0.67)  | 5.39 (0.90)                             | 5.45 (0.87)     | 5.52 (0.87)           |
| Mid-PGY3          | Asian         | Female | 5.55 (0.98)                            | 4.93 (1.06)       | 5.41 (0.77)  | 5.20 (0.96)                             | 5.38 (0.91)     | 5.36 (0.80)           |
| Mid-PGY3          | URM           | Male   | 5.50 (1.05)                            | 4.89 (1.24)       | 5.46 (0.74)  | 5.30 (1.05)                             | 5.21 (1.15)     | 5.43 (0.80)           |
| Mid-PGY3          | URM           | Female | 5.57 (0.85)                            | 4.40 (1.08)       | 5.51 (0.68)  | 5.08 (0.90)                             | 5.24 (1.26)     | 5.37 (0.68)           |



|          |       |        |             |             |             |             |             |             |
|----------|-------|--------|-------------|-------------|-------------|-------------|-------------|-------------|
| End-PGY3 | White | Male   | 6.15 (0.79) | 5.76 (1.21) | 6.20 (0.61) | 5.91 (0.93) | 5.97 (0.86) | 5.97 (0.66) |
| End-PGY3 | White | Female | 6.22 (0.80) | 5.43 (1.34) | 6.17 (0.61) | 5.86 (0.88) | 6.01 (0.86) | 6.03 (0.70) |
| End-PGY3 | Asian | Male   | 6.04 (0.79) | 5.50 (1.26) | 6.13 (0.68) | 5.91 (0.86) | 5.93 (0.84) | 6.05 (0.79) |
| End-PGY3 | Asian | Female | 6.17 (0.81) | 5.63 (1.05) | 6.18 (0.55) | 5.82 (0.87) | 6.06 (0.81) | 5.95 (0.63) |
| End-PGY3 | URM   | Male   | 6.07 (0.88) | 5.27 (1.16) | 6.00 (0.68) | 5.75 (0.97) | 5.80 (0.86) | 5.89 (0.64) |
| End-PGY3 | URM   | Female | 5.86 (0.98) | 5.08 (1.16) | 5.96 (0.72) | 5.45 (0.99) | 5.59 (1.11) | 5.81 (0.70) |
| Mid-PGY4 | White | Male   | 6.90 (0.83) | 6.31 (1.2)  | 6.93 (0.62) | 6.61 (1.15) | 6.75 (0.86) | 6.72 (0.67) |
| Mid-PGY4 | White | Female | 6.90 (0.65) | 6.05 (1.28) | 6.88 (0.53) | 6.59 (0.89) | 6.79 (0.72) | 6.73 (0.56) |
| Mid-PGY4 | Asian | Male   | 6.71 (0.73) | 6.26 (1.12) | 6.89 (0.48) | 6.64 (0.74) | 6.70 (0.71) | 6.72 (0.60) |
| Mid-PGY4 | Asian | Female | 6.69 (0.64) | 6.15 (1.10) | 6.78 (0.54) | 6.54 (0.86) | 6.70 (0.82) | 6.55 (0.58) |
| Mid-PGY4 | URM   | Male   | 6.72 (0.74) | 6.00 (1.15) | 6.78 (0.62) | 6.46 (1.14) | 6.59 (0.93) | 6.62 (0.64) |
| Mid-PGY4 | URM   | Female | 6.51 (1.18) | 5.73 (1.45) | 6.60 (1.06) | 6.29 (1.25) | 6.43 (1.27) | 6.44 (1.07) |
| End-PGY4 | White | Male   | 7.32 (0.62) | 6.89 (0.88) | 7.40 (0.48) | 7.14 (0.85) | 7.22 (0.62) | 7.21 (0.47) |
| End-PGY4 | White | Female | 7.33 (0.57) | 6.78 (1.00) | 7.36 (0.43) | 7.17 (0.62) | 7.22 (0.57) | 7.17 (0.46) |
| End-PGY4 | Asian | Male   | 7.23 (0.61) | 6.82 (1.08) | 7.36 (0.42) | 7.15 (0.57) | 7.19 (0.61) | 7.19 (0.49) |
| End-PGY4 | Asian | Female | 7.17 (0.54) | 6.77 (0.95) | 7.29 (0.44) | 7.05 (0.72) | 7.16 (0.65) | 7.03 (0.42) |
| End-PGY4 | URM   | Male   | 7.03 (0.59) | 6.63 (1.02) | 7.18 (0.48) | 6.87 (1.03) | 6.87 (0.82) | 7.02 (0.43) |
| End-PGY4 | URM   | Female | 7.02 (0.71) | 6.65 (0.89) | 7.13 (0.53) | 6.94 (0.73) | 6.84 (0.89) | 6.95 (0.57) |

**eTable 7. Adjusted Differences in Mean Competency Scores Over the Evaluation Period for US Emergency Residents in Three-Year Programs by Each Ethnoracial Group and Sex Cross-Strata**

| Assessment Period | Racial Groups | Sex    | Interpersonal and Communication Skills |               | Medical Knowledge |                | Patient Care |               | Practice-Based Learning and Improvement |               | Professionalism |               | System-Based Practice |               |
|-------------------|---------------|--------|----------------------------------------|---------------|-------------------|----------------|--------------|---------------|-----------------------------------------|---------------|-----------------|---------------|-----------------------|---------------|
|                   |               |        | $\beta$                                | 95% CI        | $\beta$           | 95% CI         | $\beta$      | 95% CI        | $\beta$                                 | 95% CI        | $\beta$         | 95% CI        | $\beta$               | 95% CI        |
| Mid-PGY1          | White         | Female | 0.055                                  | -0.082, 0.192 | -0.005            | -0.121, 0.111  | 0.022        | -0.086, 0.130 | 0.020                                   | -0.141, 0.181 | 0.127           | -0.030, 0.284 | 0.039                 | -0.085, 0.163 |
| Mid-PGY1          | Asian         | Male   | -0.026                                 | -0.211, 0.159 | 0.131             | -0.026, 0.288  | -0.032       | -0.178, 0.114 | 0.056                                   | -0.161, 0.274 | 0.013           | -0.198, 0.225 | -0.010                | -0.177, 0.157 |
| Mid-PGY1          | Asian         | Female | -0.115                                 | -0.364, 0.135 | -0.100            | -0.309, 0.110  | -0.010       | -0.207, 0.186 | 0.018                                   | -0.274, 0.310 | 0.058           | -0.227, 0.342 | 0.009                 | -0.216, 0.234 |
| Mid-PGY1          | URM           | Male   | 0.056                                  | -0.155, 0.268 | 0.029             | -0.150, 0.208  | -0.108       | -0.275, 0.059 | 0.028                                   | -0.220, 0.276 | 0.031           | -0.209, 0.272 | -0.002                | -0.193, 0.189 |
| Mid-PGY1          | URM           | Female | 0.006                                  | -0.240, 0.251 | -0.135            | -0.342, 0.072  | -0.051       | -0.244, 0.143 | 0.182                                   | -0.106, 0.470 | 0.137           | -0.142, 0.416 | 0.031                 | -0.191, 0.252 |
| End-PGY1          | White         | Female | 0.051                                  | -0.068, 0.171 | -0.026            | -0.121, 0.068  | 0.013        | -0.082, 0.108 | 0.008                                   | -0.123, 0.138 | 0.115           | -0.023, 0.253 | 0.029                 | -0.077, 0.134 |
| End-PGY1          | Asian         | Male   | -0.055                                 | -0.216, 0.107 | 0.076             | -0.052, 0.203  | -0.045       | -0.173, 0.083 | 0.021                                   | -0.156, 0.198 | -0.013          | -0.200, 0.173 | -0.023                | -0.165, 0.119 |
| End-PGY1          | Asian         | Female | -0.127                                 | -0.345, 0.091 | -0.171            | -0.342, 0.000  | -0.041       | -0.213, 0.131 | -0.028                                  | -0.266, 0.209 | 0.013           | -0.238, 0.263 | -0.014                | -0.206, 0.177 |
| End-PGY1          | URM           | Male   | 0.029                                  | -0.156, 0.214 | -0.069            | -0.216, 0.077  | -0.119       | -0.265, 0.028 | -0.035                                  | -0.237, 0.168 | -0.002          | -0.214, 0.210 | -0.022                | -0.185, 0.140 |
| End-PGY1          | URM           | Female | -0.018                                 | -0.233, 0.197 | -0.203            | -0.372, -0.033 | -0.077       | -0.247, 0.093 | 0.072                                   | -0.163, 0.306 | 0.081           | -0.165, 0.326 | -0.005                | -0.194, 0.184 |
| Mid-PGY2          | White         | Female | 0.048                                  | -0.059, 0.154 | -0.048            | -0.138, 0.043  | 0.004        | -0.082, 0.090 | -0.005                                  | -0.117, 0.107 | 0.103           | -0.020, 0.227 | 0.018                 | -0.074, 0.110 |
| Mid-PGY2          | Asian         | Male   | -0.084                                 | -0.227, 0.060 | 0.020             | -0.102, 0.142  | -0.058       | -0.174, 0.058 | -0.014                                  | -0.166, 0.137 | -0.040          | -0.207, 0.127 | -0.036                | -0.160, 0.088 |
| Mid-PGY2          | Asian         | Female | -0.140                                 | -0.334, 0.054 | -0.243            | -0.407, -0.079 | -0.071       | -0.228, 0.085 | -0.075                                  | -0.279, 0.129 | -0.032          | -0.257, 0.193 | -0.038                | -0.205, 0.130 |
| Mid-PGY2          | URM           | Male   | 0.001                                  | -0.164, 0.166 | -0.167            | -0.308, -0.027 | -0.130       | -0.263, 0.004 | -0.098                                  | -0.272, 0.076 | -0.036          | -0.226, 0.155 | -0.043                | -0.185, 0.100 |
| Mid-PGY2          | URM           | Female | -0.041                                 | -0.232, 0.150 | -0.271            | -0.433, -0.109 | -0.102       | -0.257, 0.052 | -0.039                                  | -0.240, 0.163 | 0.025           | -0.196, 0.245 | -0.040                | -0.205, 0.125 |

|          |       |        |        |                   |        |                   |        |                   |        |                   |        |                  |        |                  |
|----------|-------|--------|--------|-------------------|--------|-------------------|--------|-------------------|--------|-------------------|--------|------------------|--------|------------------|
| End-PGY2 | White | Female | 0.044  | -0.055,<br>0.143  | -0.069 | -0.175,<br>0.037  | -0.006 | -0.089,<br>0.077  | -0.017 | -0.128,<br>0.094  | 0.092  | -0.024,<br>0.208 | 0.007  | -0.078,<br>0.093 |
| End-PGY2 | Asian | Male   | -0.113 | -0.246,<br>0.020  | -0.035 | -0.178,<br>0.107  | -0.071 | -0.183,<br>0.041  | -0.050 | -0.199,<br>0.100  | -0.067 | -0.224,<br>0.089 | -0.049 | -0.165,<br>0.067 |
| End-PGY2 | Asian | Female | -0.152 | -0.332,<br>0.028  | -0.314 | -0.507,<br>-0.122 | -0.102 | -0.254,<br>0.050  | -0.121 | -0.324,<br>0.081  | -0.077 | -0.288,<br>0.135 | -0.061 | -0.218,<br>0.095 |
| End-PGY2 | URM   | Male   | -0.026 | -0.179,<br>0.127  | -0.266 | -0.429,<br>-0.103 | -0.141 | -0.270,<br>-0.011 | -0.161 | -0.333,<br>0.011  | -0.069 | -0.248,<br>0.109 | -0.063 | -0.196,<br>0.070 |
| End-PGY2 | URM   | Female | -0.064 | -0.242,<br>0.113  | -0.339 | -0.528,<br>-0.150 | -0.128 | -0.278,<br>0.021  | -0.149 | -0.348,<br>0.051  | -0.032 | -0.238,<br>0.175 | -0.075 | -0.229,<br>0.079 |
| Mid-PGY3 | White | Female | 0.040  | -0.057,<br>0.138  | -0.090 | -0.224,<br>0.044  | -0.015 | -0.102,<br>0.072  | -0.030 | -0.158,<br>0.098  | 0.080  | -0.036,<br>0.196 | -0.003 | -0.092,<br>0.085 |
| Mid-PGY3 | Asian | Male   | -0.142 | -0.273,<br>-0.010 | -0.091 | -0.271,<br>0.090  | -0.084 | -0.201,<br>0.034  | -0.085 | -0.257,<br>0.087  | -0.094 | -0.251,<br>0.063 | -0.062 | -0.181,<br>0.057 |
| Mid-PGY3 | Asian | Female | -0.165 | -0.343,<br>0.014  | -0.386 | -0.630,<br>-0.142 | -0.133 | -0.292,<br>0.026  | -0.168 | -0.401,<br>0.065  | -0.122 | -0.333,<br>0.090 | -0.085 | -0.246,<br>0.077 |
| Mid-PGY3 | URM   | Male   | -0.054 | -0.205,<br>0.097  | -0.364 | -0.569,<br>-0.158 | -0.151 | -0.286,<br>-0.016 | -0.224 | -0.422,<br>-0.027 | -0.103 | -0.281,<br>0.076 | -0.083 | -0.220,<br>0.054 |
| Mid-PGY3 | URM   | Female | -0.088 | -0.263,<br>0.088  | -0.406 | -0.645,<br>-0.168 | -0.154 | -0.310,<br>0.002  | -0.259 | -0.488,<br>-0.030 | -0.088 | -0.294,<br>0.119 | -0.110 | -0.269,<br>0.048 |
| End-PGY3 | White | Female | 0.036  | -0.067,<br>0.140  | -0.112 | -0.280,<br>0.057  | -0.024 | -0.121,<br>0.072  | -0.042 | -0.199,<br>0.115  | 0.069  | -0.055,<br>0.192 | -0.014 | -0.113,<br>0.085 |
| End-PGY3 | Asian | Male   | -0.171 | -0.311,<br>-0.031 | -0.146 | -0.374,<br>0.081  | -0.097 | -0.227,<br>0.034  | -0.120 | -0.332,<br>0.091  | -0.121 | -0.288,<br>0.046 | -0.075 | -0.209,<br>0.059 |
| End-PGY3 | Asian | Female | -0.177 | -0.366,<br>0.012  | -0.458 | -0.765,<br>-0.150 | -0.163 | -0.340,<br>0.014  | -0.215 | -0.501,<br>0.072  | -0.166 | -0.392,<br>0.059 | -0.108 | -0.289,<br>0.073 |
| End-PGY3 | URM   | Male   | -0.082 | -0.242,<br>0.079  | -0.462 | -0.720,<br>-0.204 | -0.162 | -0.312,<br>-0.013 | -0.288 | -0.529,<br>-0.047 | -0.136 | -0.327,<br>0.054 | -0.103 | -0.257,<br>0.050 |
| End-PGY3 | URM   | Female | -0.111 | -0.296,<br>0.075  | -0.474 | -0.774,<br>-0.174 | -0.180 | -0.353,<br>-0.007 | -0.369 | -0.649,<br>-0.089 | -0.144 | -0.364,<br>0.076 | -0.146 | -0.324,<br>0.032 |

PGY: postgraduate year; CI: confidence interval

**eTable 8. Adjusted Differences in Mean Competency Scores Over the Evaluation Period for US Emergency Residents in *Four-Year Programs* by Each Ethnoracial Group and Sex Cross-Strata**

| Assessment Period | Racial Groups | Sex    | Interpersonal and Communication Skills |               | Medical Knowledge |                | Patient Care |               | Practice-Based Learning and Improvement |               | Professionalism |               | System-Based Practice |               |
|-------------------|---------------|--------|----------------------------------------|---------------|-------------------|----------------|--------------|---------------|-----------------------------------------|---------------|-----------------|---------------|-----------------------|---------------|
|                   |               |        | $\beta$                                | 95% CI        | $\beta$           | 95% CI         | $\beta$      | 95% CI        | $\beta$                                 | 95% CI        | $\beta$         | 95% CI        | $\beta$               | 95% CI        |
| Mid-PGY1          | White         | Female | 0.006                                  | -0.339, 0.350 | -0.076            | -0.258, 0.106  | -0.037       | -0.283, 0.208 | -0.054                                  | -0.230, 0.121 | 0.000           | -0.305, 0.306 | -0.011                | -0.235, 0.212 |
| Mid-PGY1          | Asian         | Male   | -0.126                                 | -0.537, 0.285 | 0.002             | -0.211, 0.215  | -0.124       | -0.418, 0.169 | 0.051                                   | -0.155, 0.257 | -0.092          | -0.456, 0.273 | -0.023                | -0.289, 0.242 |
| Mid-PGY1          | Asian         | Female | 0.046                                  | -0.470, 0.561 | -0.290            | -0.554, -0.026 | -0.028       | -0.396, 0.341 | 0.003                                   | -0.252, 0.259 | -0.032          | -0.489, 0.425 | 0.089                 | -0.244, 0.421 |
| Mid-PGY1          | URM           | Male   | -0.034                                 | -0.503, 0.436 | -0.179            | -0.425, 0.068  | -0.102       | -0.437, 0.233 | -0.054                                  | -0.292, 0.183 | -0.121          | -0.538, 0.296 | 0.041                 | -0.263, 0.344 |
| Mid-PGY1          | URM           | Female | 0.092                                  | -0.449, 0.633 | -0.424            | -0.706, -0.141 | 0.014        | -0.373, 0.400 | -0.075                                  | -0.348, 0.197 | 0.065           | -0.416, 0.545 | -0.062                | -0.412, 0.288 |
| End-PGY1          | White         | Female | 0.008                                  | -0.287, 0.304 | -0.093            | -0.254, 0.069  | -0.037       | -0.249, 0.175 | -0.049                                  | -0.201, 0.102 | 0.009           | -0.256, 0.273 | -0.006                | -0.199, 0.186 |
| End-PGY1          | Asian         | Male   | -0.124                                 | -0.477, 0.228 | -0.004            | -0.194, 0.187  | -0.111       | -0.364, 0.143 | 0.055                                   | -0.123, 0.234 | -0.087          | -0.403, 0.229 | -0.018                | -0.247, 0.211 |
| End-PGY1          | Asian         | Female | 0.011                                  | -0.432, 0.454 | -0.269            | -0.505, -0.033 | -0.049       | -0.368, 0.269 | -0.014                                  | -0.236, 0.208 | -0.035          | -0.431, 0.361 | 0.045                 | -0.243, 0.332 |
| End-PGY1          | URM           | Male   | -0.054                                 | -0.458, 0.350 | -0.179            | -0.399, 0.041  | -0.105       | -0.395, 0.185 | -0.067                                  | -0.274, 0.139 | -0.144          | -0.505, 0.218 | 0.018                 | -0.244, 0.281 |
| End-PGY1          | URM           | Female | 0.034                                  | -0.431, 0.498 | -0.449            | -0.701, -0.198 | -0.033       | -0.367, 0.301 | -0.122                                  | -0.358, 0.114 | -0.017          | -0.434, 0.399 | -0.092                | -0.394, 0.211 |
| Mid-PGY2          | White         | Female | 0.011                                  | -0.239, 0.262 | -0.110            | -0.266, 0.046  | -0.036       | -0.218, 0.145 | -0.044                                  | -0.183, 0.094 | 0.017           | -0.211, 0.245 | -0.001                | -0.166, 0.163 |
| Mid-PGY2          | Asian         | Male   | -0.123                                 | -0.422, 0.176 | -0.009            | -0.196, 0.177  | -0.097       | -0.315, 0.120 | 0.059                                   | -0.106, 0.224 | -0.082          | -0.355, 0.191 | -0.013                | -0.210, 0.184 |
| Mid-PGY2          | Asian         | Female | -0.023                                 | -0.398, 0.353 | -0.247            | -0.480, -0.015 | -0.071       | -0.344, 0.202 | -0.031                                  | -0.237, 0.174 | -0.038          | -0.381, 0.305 | 0.000                 | -0.246, 0.247 |
| Mid-PGY2          | URM           | Male   | -0.074                                 | -0.417, 0.269 | -0.179            | -0.394, 0.036  | -0.108       | -0.356, 0.141 | -0.080                                  | -0.271, 0.110 | -0.167          | -0.479, 0.146 | -0.004                | -0.230, 0.222 |
| Mid-PGY2          | URM           | Female | -0.024                                 | -0.418, 0.369 | -0.475            | -0.720, -0.230 | -0.079       | -0.365, 0.207 | -0.168                                  | -0.385, 0.049 | -0.099          | -0.459, 0.260 | -0.121                | -0.381, 0.138 |

|          |       |        |        |                  |        |                   |        |                   |        |                   |        |                   |        |                   |
|----------|-------|--------|--------|------------------|--------|-------------------|--------|-------------------|--------|-------------------|--------|-------------------|--------|-------------------|
| End-PGY2 | White | Female | 0.014  | -0.196,<br>0.225 | -0.127 | -0.295,<br>0.041  | -0.036 | -0.191,<br>0.119  | -0.039 | -0.179,<br>0.101  | 0.026  | -0.173,<br>0.224  | 0.004  | -0.138,<br>0.146  |
| End-PGY2 | Asian | Male   | -0.121 | -0.374,<br>0.131 | -0.015 | -0.218,<br>0.188  | -0.084 | -0.270,<br>0.103  | 0.063  | -0.105,<br>0.232  | -0.077 | -0.316,<br>0.162  | -0.007 | -0.178,<br>0.163  |
| End-PGY2 | Asian | Female | -0.057 | -0.374,<br>0.260 | -0.226 | -0.480,<br>0.027  | -0.093 | -0.327,<br>0.141  | -0.049 | -0.259,<br>0.162  | -0.041 | -0.341,<br>0.259  | -0.044 | -0.257,<br>0.170  |
| End-PGY2 | URM   | Male   | -0.095 | -0.385,<br>0.196 | -0.179 | -0.411,<br>0.053  | -0.110 | -0.324,<br>0.103  | -0.093 | -0.287,<br>0.100  | -0.189 | -0.463,<br>0.085  | -0.027 | -0.222,<br>0.169  |
| End-PGY2 | URM   | Female | -0.083 | -0.414,<br>0.249 | -0.500 | -0.765,<br>-0.236 | -0.126 | -0.370,<br>0.119  | -0.214 | -0.435,<br>0.006  | -0.181 | -0.495,<br>0.133  | -0.151 | -0.375,<br>0.073  |
| Mid-PGY3 | White | Female | 0.017  | -0.164,<br>0.198 | -0.144 | -0.338,<br>0.050  | -0.035 | -0.171,<br>0.100  | -0.034 | -0.190,<br>0.121  | 0.034  | -0.146,<br>0.214  | 0.009  | -0.118,<br>0.136  |
| Mid-PGY3 | Asian | Male   | -0.120 | -0.338,<br>0.098 | -0.021 | -0.255,<br>0.214  | -0.070 | -0.234,<br>0.094  | 0.067  | -0.121,<br>0.256  | -0.072 | -0.290,<br>0.146  | -0.002 | -0.156,<br>0.151  |
| Mid-PGY3 | Asian | Female | -0.091 | -0.364,<br>0.182 | -0.205 | -0.499,<br>0.089  | -0.115 | -0.320,<br>0.091  | -0.066 | -0.302,<br>0.170  | -0.044 | -0.317,<br>0.229  | -0.088 | -0.280,<br>0.105  |
| Mid-PGY3 | URM   | Male   | -0.115 | -0.365,<br>0.136 | -0.179 | -0.447,<br>0.088  | -0.113 | -0.301,<br>0.074  | -0.107 | -0.322,<br>0.108  | -0.212 | -0.461,<br>0.037  | -0.049 | -0.225,<br>0.127  |
| Mid-PGY3 | URM   | Female | -0.141 | -0.426,<br>0.145 | -0.526 | -0.831,<br>-0.221 | -0.172 | -0.387,<br>0.043  | -0.261 | -0.506,<br>-0.015 | -0.263 | -0.548,<br>0.022  | -0.181 | -0.382,<br>0.020  |
| End-PGY3 | White | Female | 0.020  | -0.146,<br>0.186 | -0.161 | -0.391,<br>0.068  | -0.035 | -0.161,<br>0.092  | -0.029 | -0.211,<br>0.153  | 0.042  | -0.133,<br>0.218  | 0.014  | -0.108,<br>0.136  |
| End-PGY3 | Asian | Male   | -0.118 | -0.319,<br>0.083 | -0.027 | -0.304,<br>0.250  | -0.056 | -0.210,<br>0.097  | 0.071  | -0.148,<br>0.291  | -0.067 | -0.280,<br>0.146  | 0.003  | -0.145,<br>0.151  |
| End-PGY3 | Asian | Female | -0.125 | -0.377,<br>0.126 | -0.184 | -0.532,<br>0.164  | -0.136 | -0.329,<br>0.056  | -0.083 | -0.359,<br>0.193  | -0.047 | -0.314,<br>0.220  | -0.132 | -0.317,<br>0.054  |
| End-PGY3 | URM   | Male   | -0.135 | -0.366,<br>0.096 | -0.180 | -0.494,<br>0.135  | -0.116 | -0.292,<br>0.059  | -0.120 | -0.370,<br>0.131  | -0.235 | -0.478,<br>0.009  | -0.072 | -0.241,<br>0.098  |
| End-PGY3 | URM   | Female | -0.199 | -0.461,<br>0.064 | -0.552 | -0.912,<br>-0.192 | -0.218 | -0.419,<br>-0.018 | -0.307 | -0.593,<br>-0.021 | -0.345 | -0.623,<br>-0.067 | -0.211 | -0.404,<br>-0.017 |
| Mid-PGY4 | White | Female | 0.023  | -0.147,<br>0.194 | -0.178 | -0.448,<br>0.092  | -0.034 | -0.164,<br>0.095  | -0.024 | -0.239,<br>0.190  | 0.051  | -0.135,<br>0.237  | 0.019  | -0.110,<br>0.148  |
| Mid-PGY4 | Asian | Male   | -0.117 | -0.323,<br>0.090 | -0.032 | -0.358,<br>0.293  | -0.043 | -0.200,<br>0.115  | 0.075  | -0.183,<br>0.334  | -0.062 | -0.288,<br>0.164  | 0.008  | -0.148,<br>0.165  |
| Mid-PGY4 | Asian | Female | -0.159 | -0.418,<br>0.099 | -0.162 | -0.572,<br>0.247  | -0.158 | -0.355,<br>0.039  | -0.100 | -0.426,<br>0.225  | -0.050 | -0.333,<br>0.233  | -0.176 | -0.372,<br>0.020  |
| Mid-PGY4 | URM   | Male   | -0.155 | -0.392,<br>0.082 | -0.180 | -0.549,<br>0.190  | -0.119 | -0.299,<br>0.060  | -0.133 | -0.426,<br>0.161  | -0.257 | -0.515,<br>0.000  | -0.094 | -0.273,<br>0.085  |

|          |       |        |        |                   |        |                   |        |                   |        |                   |        |                   |        |                   |
|----------|-------|--------|--------|-------------------|--------|-------------------|--------|-------------------|--------|-------------------|--------|-------------------|--------|-------------------|
| Mid-PGY4 | URM   | Female | -0.257 | -0.526,<br>0.012  | -0.577 | -1.001,<br>-0.154 | -0.265 | -0.470,<br>-0.060 | -0.353 | -0.690,<br>-0.017 | -0.427 | -0.721,<br>-0.132 | -0.240 | -0.445,<br>-0.036 |
| End-PGY4 | White | Female | 0.026  | -0.167,<br>0.219  | -0.195 | -0.510,<br>0.119  | -0.034 | -0.178,<br>0.111  | -0.019 | -0.270,<br>0.232  | 0.059  | -0.151,<br>0.269  | 0.024  | -0.122,<br>0.170  |
| End-PGY4 | Asian | Male   | -0.115 | -0.348,<br>0.117  | -0.038 | -0.417,<br>0.340  | -0.029 | -0.204,<br>0.146  | 0.080  | -0.223,<br>0.382  | -0.057 | -0.311,<br>0.197  | 0.014  | -0.163,<br>0.190  |
| End-PGY4 | Asian | Female | -0.194 | -0.485,<br>0.098  | -0.141 | -0.617,<br>0.334  | -0.180 | -0.399,<br>0.039  | -0.118 | -0.498,<br>0.263  | -0.053 | -0.371,<br>0.265  | -0.220 | -0.441,<br>0.001  |
| End-PGY4 | URM   | Male   | -0.176 | -0.442,<br>0.091  | -0.180 | -0.609,<br>0.249  | -0.122 | -0.322,<br>0.077  | -0.146 | -0.489,<br>0.198  | -0.280 | -0.569,<br>0.009  | -0.117 | -0.317,<br>0.084  |
| End-PGY4 | URM   | Female | -0.315 | -0.618,<br>-0.012 | -0.603 | -1.095,<br>-0.111 | -0.311 | -0.539,<br>-0.083 | -0.400 | -0.793,<br>-0.006 | -0.509 | -0.840,<br>-0.178 | -0.270 | -0.500,<br>-0.040 |

PGY: postgraduate year; CI: confidence interval

**eTable 9. Mean Evaluation Scores for Three-Year and Four-Year Programs Over the Study Period by Each Ethnoracial Group and Sex Cross-Strata**

| Assessment Period | Racial Groups | Sex    | Three-Year Programs | Four-Year Programs |
|-------------------|---------------|--------|---------------------|--------------------|
|                   |               |        | Mean (SD)           | Mean (SD)          |
| Mid-PGY1          | White         | Male   | 2.37 (0.72)         | 2.01 (0.72)        |
| Mid-PGY1          | White         | Female | 2.45 (0.73)         | 2.01 (0.70)        |
| Mid-PGY1          | Asian         | Male   | 2.35 (0.79)         | 2.02 (0.80)        |
| Mid-PGY1          | Asian         | Female | 2.43 (0.77)         | 2.03 (0.81)        |
| Mid-PGY1          | URM           | Male   | 2.27 (0.86)         | 1.97 (0.75)        |
| Mid-PGY1          | URM           | Female | 2.44 (0.79)         | 2.29 (0.90)        |
| End-PGY1          | White         | Male   | 3.36 (0.74)         | 2.91 (0.58)        |
| End-PGY1          | White         | Female | 3.45 (0.76)         | 2.86 (0.66)        |
| End-PGY1          | Asian         | Male   | 3.33 (0.81)         | 2.90 (0.51)        |
| End-PGY1          | Asian         | Female | 3.29 (0.69)         | 2.79 (0.67)        |
| End-PGY1          | URM           | Male   | 3.28 (0.88)         | 2.64 (0.55)        |
| End-PGY1          | URM           | Female | 3.35 (0.80)         | 2.95 (0.60)        |
| Mid-PGY2          | White         | Male   | 4.42 (0.73)         | 3.79 (0.69)        |
| Mid-PGY2          | White         | Female | 4.46 (0.69)         | 3.75 (0.66)        |
| Mid-PGY2          | Asian         | Male   | 4.30 (0.83)         | 3.77 (0.69)        |
| Mid-PGY2          | Asian         | Female | 4.24 (0.71)         | 3.66 (0.83)        |
| Mid-PGY2          | URM           | Male   | 4.24 (0.74)         | 3.53 (0.86)        |
| Mid-PGY2          | URM           | Female | 4.20 (0.73)         | 3.61 (0.68)        |
| End-PGY2          | White         | Male   | 5.20 (0.68)         | 4.61 (0.67)        |
| End-PGY2          | White         | Female | 5.21 (0.69)         | 4.50 (0.77)        |
| End-PGY2          | Asian         | Male   | 5.05 (0.75)         | 4.52 (0.68)        |
| End-PGY2          | Asian         | Female | 4.98 (0.75)         | 4.55 (0.82)        |
| End-PGY2          | URM           | Male   | 4.99 (0.76)         | 4.38 (0.84)        |
| End-PGY2          | URM           | Female | 5.00 (0.69)         | 4.33 (0.72)        |
| Mid-PGY3          | White         | Male   | 6.06 (0.73)         | 5.38 (0.65)        |
| Mid-PGY3          | White         | Female | 6.11 (0.65)         | 5.34 (0.70)        |
| Mid-PGY3          | Asian         | Male   | 5.95 (0.78)         | 5.38 (0.71)        |
| Mid-PGY3          | Asian         | Female | 5.89 (0.78)         | 5.31 (0.76)        |
| Mid-PGY3          | URM           | Male   | 5.82 (0.77)         | 5.30 (0.83)        |
| Mid-PGY3          | URM           | Female | 5.94 (0.65)         | 5.19 (0.69)        |
| End-PGY3          | White         | Male   | 6.84 (0.62)         | 5.99 (0.65)        |
| End-PGY3          | White         | Female | 6.88 (0.54)         | 5.95 (0.65)        |
| End-PGY3          | Asian         | Male   | 6.72 (0.60)         | 5.93 (0.66)        |
| End-PGY3          | Asian         | Female | 6.71 (0.59)         | 5.97 (0.57)        |
| End-PGY3          | URM           | Male   | 6.56 (0.77)         | 5.80 (0.68)        |
| End-PGY3          | URM           | Female | 6.64 (0.70)         | 5.63 (0.68)        |
| Mid-PGY4          | White         | Male   | –                   | 6.70 (0.67)        |
| Mid-PGY4          | White         | Female | –                   | 6.66 (0.59)        |
| Mid-PGY4          | Asian         | Male   | –                   | 6.65 (0.55)        |

|          |       |        |   |             |
|----------|-------|--------|---|-------------|
| Mid-PGY4 | Asian | Female | – | 6.57 (0.58) |
| Mid-PGY4 | URM   | Male   | – | 6.53 (0.67) |
| Mid-PGY4 | URM   | Female | – | 6.33 (1.07) |
| End-PGY4 | White | Male   | – | 7.20 (0.47) |
| End-PGY4 | White | Female | – | 7.17 (0.45) |
| End-PGY4 | Asian | Male   | – | 7.16 (0.48) |
| End-PGY4 | Asian | Female | – | 7.08 (0.45) |
| End-PGY4 | URM   | Male   | – | 6.93 (0.53) |
| End-PGY4 | URM   | Female | – | 6.92 (0.54) |

PGY: postgraduate year; CI: confidence interval



**eTable 10. Adjusted Differences in Mean Evaluation Scores for Three-Year and Four-Year Programs Over the Study Period by Each Ethnoracial Group and Sex Cross-Strata**

| Assessment Period | Racial Groups | Sex    | Three-Year Programs |                | Four-Year Programs |                |
|-------------------|---------------|--------|---------------------|----------------|--------------------|----------------|
|                   |               |        | $\beta$             | 95% CI         | $\beta$            | 95% CI         |
| Mid-PGY1          | White         | Female | 0.035               | -0.068, 0.139  | -0.020             | -0.230, 0.190  |
| Mid-PGY1          | Asian         | Male   | 0.035               | -0.104, 0.175  | -0.061             | -0.311, 0.190  |
| Mid-PGY1          | Asian         | Female | -0.025              | -0.213, 0.163  | -0.031             | -0.345, 0.283  |
| Mid-PGY1          | URM           | Male   | 0.013               | -0.147, 0.172  | -0.074             | -0.360, 0.213  |
| Mid-PGY1          | URM           | Female | 0.013               | -0.172, 0.198  | -0.062             | -0.393, 0.268  |
| End-PGY1          | White         | Female | 0.023               | -0.068, 0.114  | -0.019             | -0.201, 0.164  |
| End-PGY1          | Asian         | Male   | 0.006               | -0.117, 0.129  | -0.056             | -0.274, 0.162  |
| End-PGY1          | Asian         | Female | -0.064              | -0.229, 0.102  | -0.048             | -0.321, 0.225  |
| End-PGY1          | URM           | Male   | -0.031              | -0.172, 0.110  | -0.086             | -0.336, 0.163  |
| End-PGY1          | URM           | Female | -0.040              | -0.203, 0.123  | -0.110             | -0.397, 0.178  |
| Mid-PGY2          | White         | Female | 0.011               | -0.072, 0.095  | -0.018             | -0.175, 0.140  |
| Mid-PGY2          | Asian         | Male   | -0.024              | -0.137, 0.090  | -0.052             | -0.241, 0.138  |
| Mid-PGY2          | Asian         | Female | -0.103              | -0.255, 0.050  | -0.066             | -0.303, 0.172  |
| Mid-PGY2          | URM           | Male   | -0.075              | -0.205, 0.055  | -0.099             | -0.316, 0.118  |
| Mid-PGY2          | URM           | Female | -0.093              | -0.244, 0.058  | -0.157             | -0.406, 0.092  |
| End-PGY2          | White         | Female | -0.001              | -0.084, 0.083  | -0.017             | -0.156, 0.122  |
| End-PGY2          | Asian         | Male   | -0.053              | -0.166, 0.060  | -0.047             | -0.215, 0.120  |
| End-PGY2          | Asian         | Female | -0.142              | -0.294, 0.011  | -0.083             | -0.293, 0.127  |
| End-PGY2          | URM           | Male   | -0.118              | -0.248, 0.011  | -0.112             | -0.304, 0.080  |
| End-PGY2          | URM           | Female | -0.146              | -0.296, 0.004  | -0.204             | -0.424, 0.016  |
| Mid-PGY3          | White         | Female | -0.012              | -0.102, 0.077  | -0.016             | -0.143, 0.112  |
| Mid-PGY3          | Asian         | Male   | -0.083              | -0.204, 0.039  | -0.043             | -0.198, 0.112  |
| Mid-PGY3          | Asian         | Female | -0.181              | -0.345, -0.016 | -0.101             | -0.295, 0.093  |
| Mid-PGY3          | URM           | Male   | -0.162              | -0.301, -0.023 | -0.124             | -0.302, 0.053  |
| Mid-PGY3          | URM           | Female | -0.199              | -0.360, -0.038 | -0.252             | -0.455, -0.049 |
| End-PGY3          | White         | Female | -0.024              | -0.126, 0.077  | -0.015             | -0.141, 0.112  |
| End-PGY3          | Asian         | Male   | -0.112              | -0.249, 0.025  | -0.038             | -0.193, 0.116  |
| End-PGY3          | Asian         | Female | -0.219              | -0.405, -0.034 | -0.118             | -0.311, 0.075  |
| End-PGY3          | URM           | Male   | -0.206              | -0.363, -0.049 | -0.137             | -0.313, 0.039  |
| End-PGY3          | URM           | Female | -0.252              | -0.434, -0.070 | -0.299             | -0.500, -0.098 |
| Mid-PGY4          | White         | Female | –                   | –              | -0.014             | -0.150, 0.122  |
| Mid-PGY4          | Asian         | Male   | –                   | –              | -0.034             | -0.199, 0.131  |
| Mid-PGY4          | Asian         | Female | –                   | –              | -0.136             | -0.343, 0.071  |
| Mid-PGY4          | URM           | Male   | –                   | –              | -0.149             | -0.337, 0.039  |
| Mid-PGY4          | URM           | Female | –                   | –              | -0.347             | -0.561, -0.132 |
| End-PGY4          | White         | Female | –                   | –              | -0.013             | -0.166, 0.141  |
| End-PGY4          | Asian         | Male   | –                   | –              | -0.029             | -0.215, 0.156  |
| End-PGY4          | Asian         | Female | –                   | –              | -0.153             | -0.386, 0.079  |
| End-PGY4          | URM           | Male   | –                   | –              | -0.162             | -0.373, 0.049  |
| End-PGY4          | URM           | Female | –                   | –              | -0.394             | -0.636, -0.152 |

PGY: postgraduate year; CI: confidence interval

**eFigure 1. Analytic Cohort Development and Exclusion Criteria**

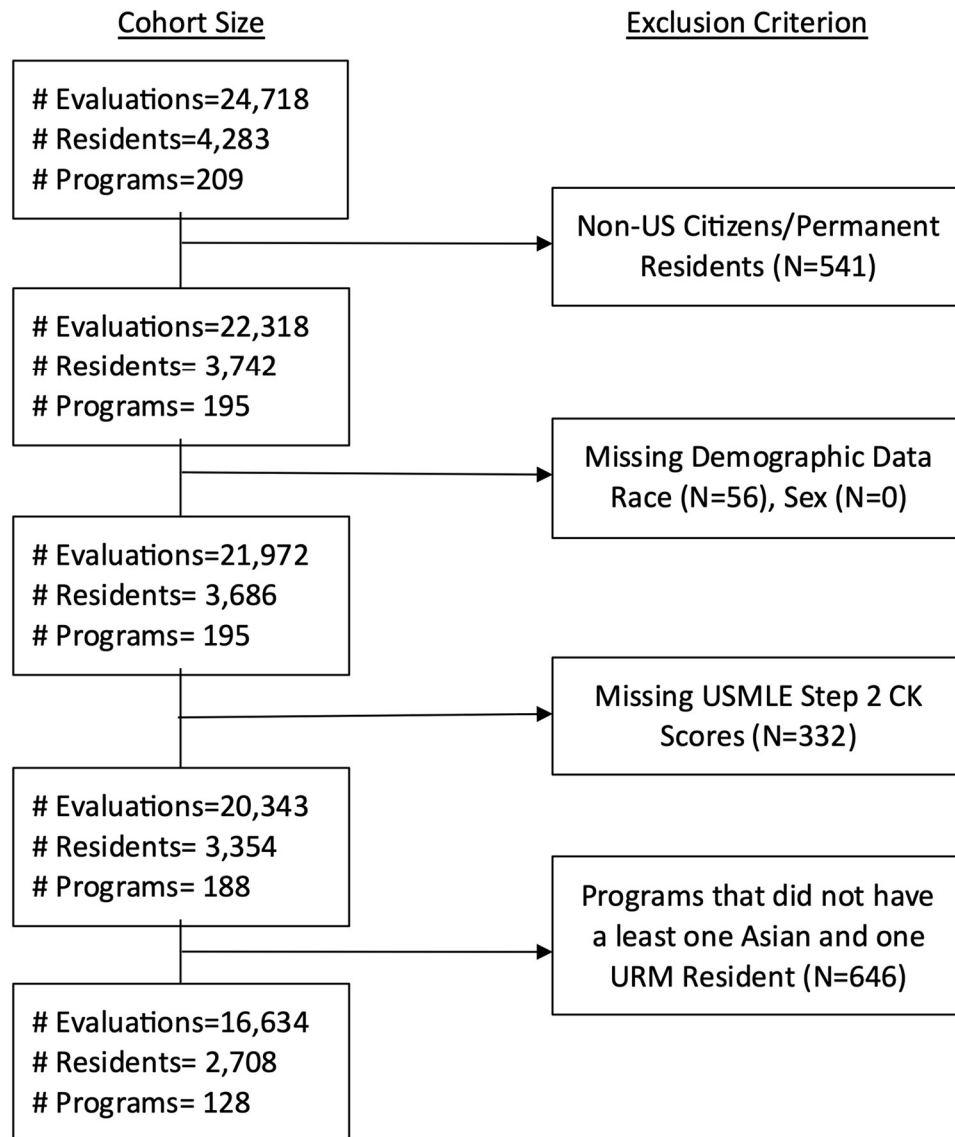

\*N indicates the number of residents whose data were excluded based on the corresponding criterion.

**eFigure 2. Mean Competency Scores for the Overall Sample.** Changes in the mean scores for 6 different ACGME competencies among US emergency medicine residents in three-year programs and four-year programs. Mean competency scores are calculated as the mean of each subcompetency scores corresponding to each competency.

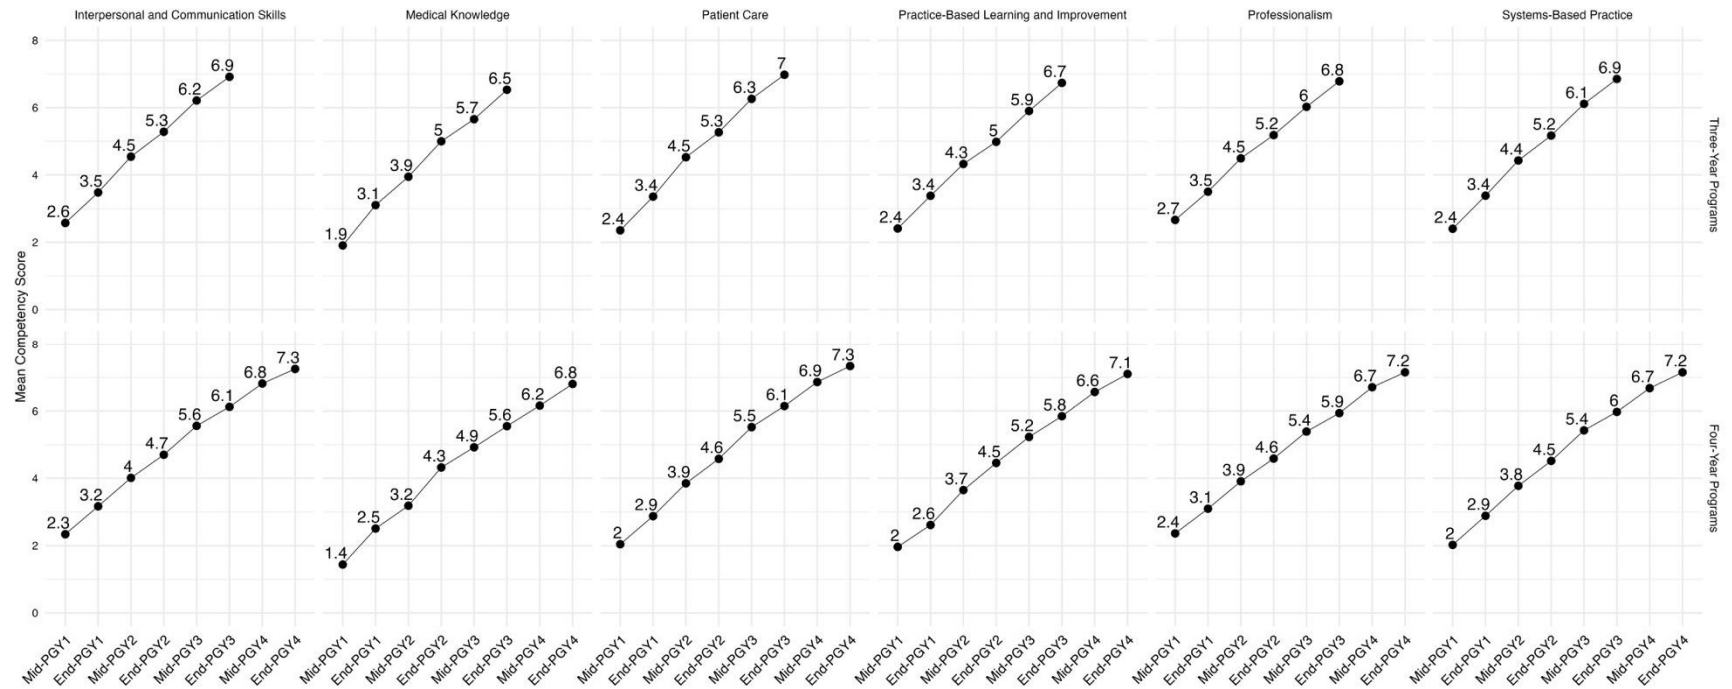

**eFigure 3. Mean Assessment Score for the Overall Sample.** Changes in the mean assessment score among emergency medicine residents in the United States by program length. Mean assessment scores are calculated as the mean of the mean 6 competencies scores for the entire sample.

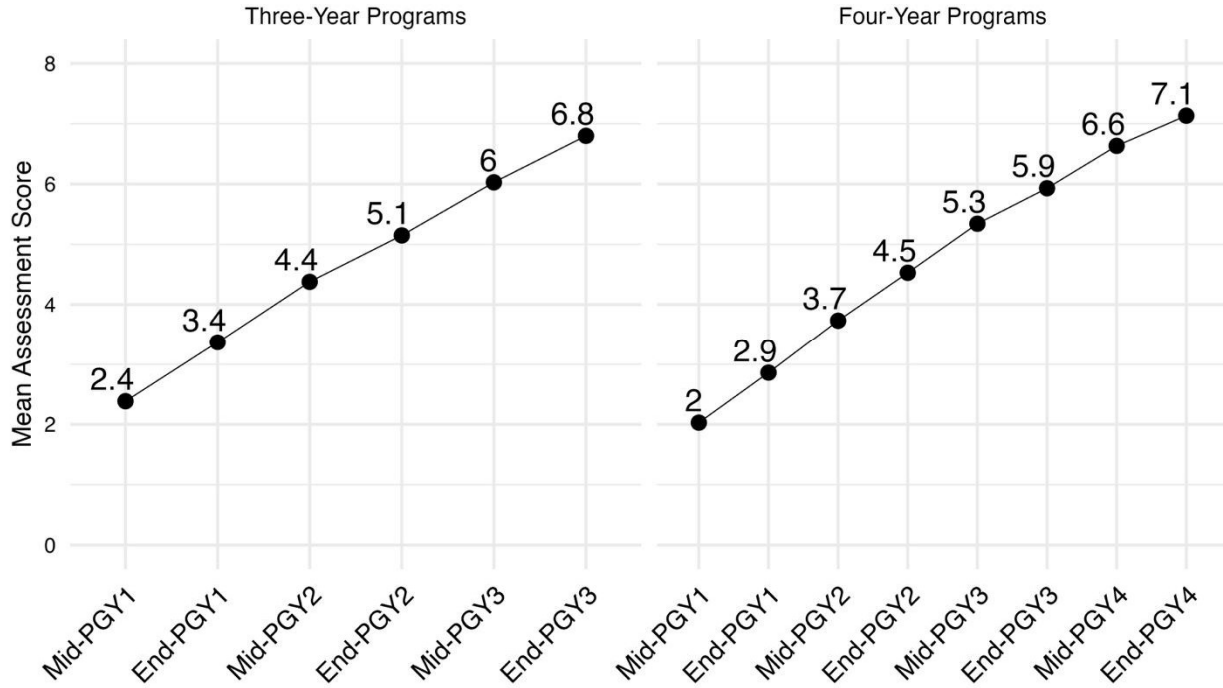

**eFigure 4. Assessment Score Trajectories by Ethnoracial Group and Sex Cross-Strata.** Changes in the mean assessment score among US emergency medicine residents in three-year and four-year programs. Mean assessment scores are calculated as the mean of the mean 6 competencies scores for each Ethnoracial Group and sex cross-strata stratified by length of program. URM: underrepresented in medicine.

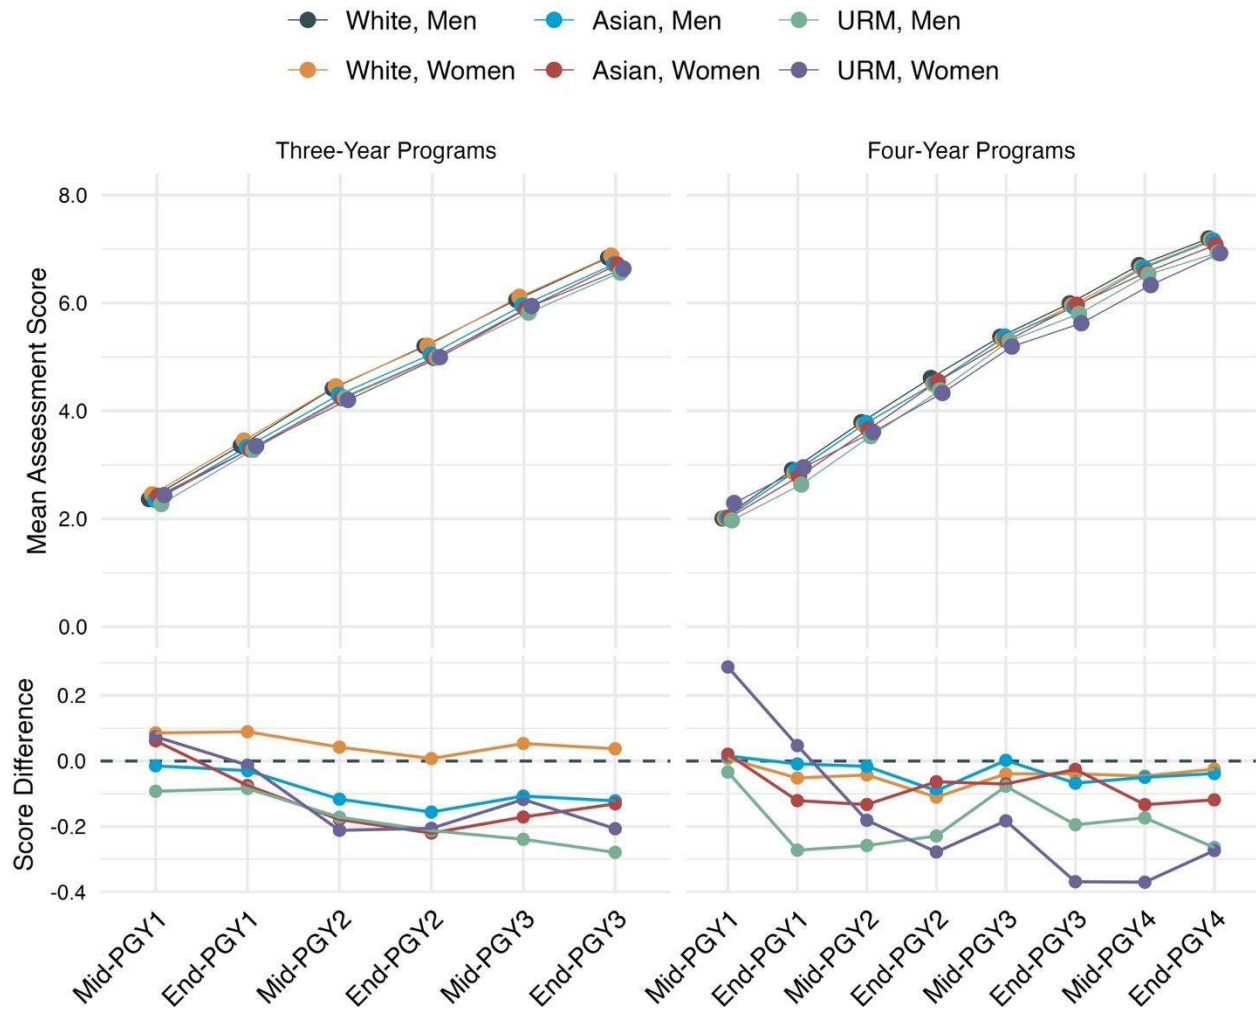

Supplement: jamanetwopen-e2330847-s001.pdf [file jamanetwopen-e2330847-s001.pdf]
