# Supplementary material for: Intersectional Disparities in Emergency Medicine Residents’ Performance Assessments by Race, Ethnicity, and Sex
Source: PubMed Central journal article supplement (PMC10514741; doi:10.1001/jamanetworkopen.2023.30847), 2023-09-21
Supplement: jamanetwopen-e2330847-s002.pdf [file jamanetwopen-e2330847-s002.pdf]

## Data Sharing Statement

Lett. Intersectional Disparities in Emergency Medicine Residents' Performance Assessments by Race, Ethnicity, and Sex. *JAMA Netw Open*. Published September 11, 2023.  
doi:10.1001/jamanetworkopen.2023.30847

### Data

**Data available:** No

### Additional Information

**Explanation for why data not available:** This data is sensitive data provided by the Association of American Medical Colleges and Accreditation Council of Graduate Medical Education and cannot be made public for trainee privacy and safety.
